# Supplementary material for: Steller’s sea cow genome suggests this species began going extinct before the arrival of Paleolithic humans
Source: Springer Nature journal article supplement (doi:10.1038/s41467-021-22567-5), 2021-04-13
Supplement: 41467_2021_22567_MOESM4_ESM.pdf [file 41467_2021_22567_MOESM4_ESM.pdf]

### **Description of Additional Supplementary Files**

File Name: Supplementary Data 1

Description: Analysis of single nucleotide polymorphisms (SNPs) in the Steller's sea cow nuclear genome

File Name: Supplementary Data 2

Description: The genes name for the nonsense variants in the Steller's sea cow nuclear genome

File Name: Supplementary Data 3

Description: The genes name for the nonsynonymous variants in the Steller's sea cow nuclear genome

File Name: Supplementary Data 4

Description: The list of the loci that were under positive selection in the Steller's sea cow nuclear genome
